# Supplementary material
Source: publisher figshare collection journal article supplement (https://acs.figshare.com/ndownloader/files/18132782)
Supplement: Supplementary file 1 [file 18132782]

## SUPPORTING INFORMATION

### Structure Property Correlation of a Series of Halogenated Schiff Base Crystals and Understanding Molecular Basis Through Nanoindentation

Ragaverthini Chinnasamy,<sup>a</sup> Amutha Arul,<sup>a</sup> Ammar AlMousa,<sup>c</sup> Mangalampalli S. R. N. Kiran,<sup>b</sup> Priyadip Das,<sup>a</sup> Almaz S. Jalilov,<sup>c</sup> Abdul Malik P. Peedikakkal\*<sup>c</sup> and Soumyajit Ghosh\*<sup>a</sup>

<sup>a</sup>*Department of Chemistry, SRM Institute of Science and Technology, Chennai 603 203, India*

<sup>b</sup>*Nanomechanics Laboratory Department of Physics and Nanotechnology, SRM Institute of Science and Technology, Chennai 603 203, India*

<sup>a</sup>*Department of Chemistry, SRM Institute of Science and Technology, Chennai 603 203, India, E-mail: [soumyajitghosh89@gmail.com](mailto:soumyajitghosh89@gmail.com)*

<sup>c</sup>*Department of Chemistry, King Fahd University of Petroleum and Minerals, P.O. Box 5048, Dhahran 31261, Saudi Arabia, [malikchem@gmail.com](mailto:malikchem@gmail.com)*

| Contents                                                                       | Page    |
|--------------------------------------------------------------------------------|---------|
| Materials and synthesis.....                                                   | S2.     |
| Supporting tables.....                                                         | S3-S5.  |
| Supporting figures.....                                                        | S6-S12. |
| BFDH Morphology of crystals 3a, 3b and 4.....                                  | S12.    |
| Height profiles of Residual Indent images on the crystals after unloading..... | S13.    |
| References.....                                                                | S14.    |

## 1. Materials and synthesis

### Experimental section

**Materials.** All the compounds Trans-4-methoxy cinnamaldehyde, 2,3-dichloro benzaldehyde, 3,5-di-tertiary-butyl salicylaldehyde, 4-bromoaniline, 4-chloroaniline, 4-fluoro-3-nitro aniline, 3,4-dichloroaniline, 2,5-dichloroaniline were purchased from Sigma-Aldrich. Commercially available solvents were used as received without further purification.

### Single Crystal Preparation

The single crystals were grown in a series of solvents such as ethanol, acetone, toluene, methanol, acetonitrile etc., at ambient conditions. Crystals were synthesized by adding one equivalent each of the respective benzaldehydes (Trans-4-methoxy cinnamaldehyde for **1** to **3b**, 2,3 Dichlorobenzaldehyde for **4** and 3,5-di-tertiary-butyl salicylaldehyde for **5**) and halogen substituted aniline in hot ethanol followed by slow evaporation of the solution at ambient conditions. Long, good diffraction quality crystals were obtained after 4-5 days.

### Powder X-Ray Diffraction (PXRD).

The PXRD patterns were collected on a Rigaku SmartLab with a Cu K $\alpha$  radiation (1.540 Å). The tube voltage and amperage were set at 40 kV and 50 mA respectively. Each sample was scanned between 5 and 50° 2 $\theta$  with a step size of 0.02° (Figure S2-S6). The instrument was previously calibrated using a silicon standard.

### X-ray Crystallographic Analysis

Intensity data for **1** and **2a** were collected on a Bruker AXS D8 Venture diffractometer using MoK $\alpha$  ( $\lambda$  = 0.71073 Å) radiation generated by I $\mu$ s microfocus tube. Data were recorded with a Bruker AXS PHOTON II CPAD detector. The data collections were performed at 298 K using  $\omega$ -and  $\phi$ -scans. The data were processed using APEX3 Crystal Structure Analysis Package (Bruker AXS). Data collection: APEX3,<sup>1</sup> cell refinement: SAINT,<sup>2</sup> data reduction:

SAINT,<sup>2</sup> absorption correction: SADABS,<sup>3</sup> structure solution: direct methods (SHELXT-2014)<sup>4</sup> and structure refinement: full-matrix least-squares method on  $F^2$  (SHELXT-2014)<sup>5</sup> using SHELXT as the graphical user interface,<sup>6</sup> molecular graphics: program XP (part of the SHELXT 6.14 program library).<sup>7</sup> The crystal data as well as details of data collection and refinement of **1-5** are summarized in Table S1.

**Table S1.** Crystallographic Information Table

| Compounds               | <b>1</b>                                                                       | <b>2</b>                             | <b>3a</b>                                                       | <b>3b</b>                                                      | <b>4</b>                                              | <b>5</b>                                            |
|-------------------------|--------------------------------------------------------------------------------|--------------------------------------|-----------------------------------------------------------------|----------------------------------------------------------------|-------------------------------------------------------|-----------------------------------------------------|
| Formula                 | C <sub>33</sub> H <sub>29</sub> Cl <sub>12</sub> N <sub>7</sub> O <sub>2</sub> | C <sub>16</sub> H <sub>14</sub> BrNO | C <sub>16</sub> H <sub>13</sub> F N <sub>2</sub> O <sub>3</sub> | C <sub>16</sub> H <sub>13</sub> FN <sub>2</sub> O <sub>3</sub> | C <sub>13</sub> H <sub>7</sub> Cl <sub>4</sub> N      | C <sub>20</sub> H <sub>22</sub> Cl <sub>2</sub> N O |
| Formula weight          | 542.47                                                                         | 316.19                               | 311.30                                                          | 311.30                                                         | 319.00                                                | 363.28                                              |
| T/K                     | 298(2)                                                                         | 298(2)                               | 296(2) K                                                        | 296(2) K                                                       | 296(2) K                                              | 296(2) K                                            |
| Crystal system          | Monoclinic                                                                     | Orthorhombic                         | Triclinic                                                       | Monoclinic                                                     | Orthorhombic                                          | Triclinic                                           |
| Space group             | <i>Pc</i>                                                                      | <i>Pna</i> 2 <sub>1</sub>            | <i>P</i> -1                                                     | <i>Pc</i>                                                      | <i>P</i> 2 <sub>1</sub> 2 <sub>1</sub> 2 <sub>1</sub> | <i>P</i> -1                                         |
| a/Å                     | 31.1422 (2)                                                                    | 6.272(5)                             | 7.7591(4) Å                                                     | 3.9667(6) Å                                                    | 4.2341(3) Å                                           | 6.1429(11) Å                                        |
| b/Å                     | 7.1528(4)                                                                      | 7.154(5)                             | 9.7069(6) Å                                                     | 24.324(4) Å                                                    | 6.3411(5) Å                                           | 10.429(2) Å                                         |
| c/Å                     | 6.2409(5)                                                                      | 31.32(2)                             | 11.0077(6) Å                                                    | 29.265(4) Å                                                    | 48.203(4) Å                                           | 16.759(4) Å                                         |
| α/°                     | 90°                                                                            | 90°                                  | 102.169(2)°                                                     | 90°                                                            | 90°                                                   | 104.566(9)°                                         |
| β/°                     | 90.010(3)°                                                                     | 90°                                  | 107.957(2)°                                                     | 90°                                                            | 90°                                                   | 94.636(9)°                                          |
| γ/°                     | 90°                                                                            | 90°                                  | 104.897(2)°                                                     | 90°                                                            | 90°                                                   | 100.047(8)°                                         |
| Volume/Å <sup>3</sup>   | 1390.19(2)                                                                     | 1405.2(2)                            | 723.24(7)                                                       | 2823.6(7)                                                      | 1294.20(17)                                           | 1014.5(3)                                           |
| <i>Z</i>                | 2                                                                              | 4                                    | 2                                                               | 8                                                              | 4                                                     | 2                                                   |
| ρ, Mg.cm <sup>-3</sup>  | 1.296                                                                          | 1.495                                | 1.429                                                           | 1.337                                                          | 1.637                                                 | 1.189                                               |
| μ /mm <sup>-1</sup>     | 0.264                                                                          | 2.196                                | 0.106                                                           | 0.099                                                          | 0.892                                                 | 0.326                                               |
| Reflections collected   | 12569                                                                          | 14350                                | 21941                                                           | 10390                                                          | 9822                                                  | 33850                                               |
| Independent Reflections | 3796                                                                           | 2006                                 | 3614                                                            | 7419                                                           | 3144                                                  | 5022                                                |

|                                  |         |         |         |         |         |         |
|----------------------------------|---------|---------|---------|---------|---------|---------|
| R <sub>int</sub>                 | 0.0628  | 0.0475  | 0.0575  | 0.0705  | 0.0292  | 0.0488  |
| GOF                              | 0.869   | 0.895   | 0.982   | 1.011   | 0.840   | 1.098   |
| Final R[I >2σ]                   | 0.0479  | 0.0352  | 0.0525  | 0.0624  | 0.0422  | 0.0634  |
| R <sub>1</sub> / wR <sub>2</sub> | 0.1314  | 0.1057  | 0.1301  | 0.0750  | 0.1261  | 0.1632  |
| CCDC Number.                     | 1905300 | 1905301 | 1905303 | 1905302 | 1905304 | 1905305 |

**Table S2.** Results from the recrystallization of Schiff base from one solvent or mixture of solvents

| Compound  | Solvent       | Observations         |
|-----------|---------------|----------------------|
| Crystal 1 | Ethanol       | Block Shaped Crystal |
|           | Methanol      | Block Shaped Crystal |
|           | Acetone       | Powder               |
|           | Acetonitrile  | Block Shaped Crystal |
|           | Ethyl Acetate | Powder               |
|           | Toluene       | Block Shaped Crystal |
|           | DCM           | Powder               |
|           | Chloroform    | Powder               |
|           | 1,4 Dioxane   | Powder               |
|           | THF           | Powder               |
|           | Hexane        | Powder               |
| Crystal 2 | Ethanol       | Block Shaped Crystal |
|           | Methanol      | Block Shaped Crystal |
|           | Acetone       | Powder               |
|           | Acetonitrile  | Block Shaped Crystal |
|           | Ethyl Acetate | Powder               |
|           | Toluene       | Block Shaped Crystal |
|           | DCM           | Powder               |
|           | Chloroform    | Powder               |
|           | 1,4 Dioxane   | Powder               |
|           | THF           | Powder               |
|           | Hexane        | Powder               |
| Crystal3a | Ethanol       | Plate Shape          |
|           | Methanol      | Plate Shape          |
|           | Acetone       | Powder               |
|           | Acetonitrile  | Plate Shape          |
|           | Ethyl Acetate | Powder               |
|           | Toluene       | Plate Shape          |
|           | DCM           | Powder               |
|           | Chloroform    | Powder               |

|            |               |                           |
|------------|---------------|---------------------------|
|            | 1,4 Dioxane   | Powder                    |
|            | THF           | Powder                    |
|            | Hexane        | Powder                    |
| Crystal 3b | Ethanol       | Fine needles, block shape |
|            | Methanol      | Fine needles, block shape |
|            | Acetone       | Powder                    |
|            | Acetonitrile  | Powder                    |
|            | Ethyl Acetate | Powder                    |
|            | Toluene       | Block Shape               |
|            | DCM           | Powder                    |
|            | Chloroform    | Powder                    |
| Crystal 4  | Ethanol       | Fine needles              |
|            | Methanol      | Fine needles              |
|            | Acetone       | Powder                    |
|            | Acetonitrile  | Plate shape               |
|            | Ethyl Acetate | Powder                    |
|            | Toluene       | Fine needles              |
|            | DCM           | Powder                    |
|            | Chloroform    | Powder                    |
|            | 1,4 Dioxane   | Powder                    |
|            | Hexane        | Powder                    |
| Crystal 5  | Ethanol       | Powder                    |
|            | Methanol      | Fine needles              |
|            | Acetone       | Powder                    |
|            | Acetonitrile  | Powder                    |
|            | Ethyl Acetate | Powder                    |
|            | Toluene       | Powder                    |
|            | DCM           | Powder                    |
|            | Chloroform    | Powder                    |
|            | 1,4 Dioxane   | Powder                    |
|            | THF           | Powder                    |
|            | Hexane        | Powder                    |

### Thermal Properties:

A detailed DSC and TGA experiments were carried out of all the above crystals to study their thermal behaviour with respect to its starting materials. Crystal **1** shows a sharp single melting endotherm at 134.23°C and crystal **2** shows at 165.23°C. There are two polymorphs of the same compound **3a** and **3b** where block crystal (**3a**) showing endotherm at 137.23°C whereas needle shaped crystal (**3b**) showing endotherm at 134.23°C. This indicated that the crystal is dimorphic. The needle shaped crystals **4** is showing single melting endotherm at 135.23°C and **5** is showing at 110.23°C. The melting transition temperature of all the crystals were different from either of the individual components confirming the formation of new phase. The thermogram shows the stability of the crystal and proves that there is no weight loss beyond the melting.

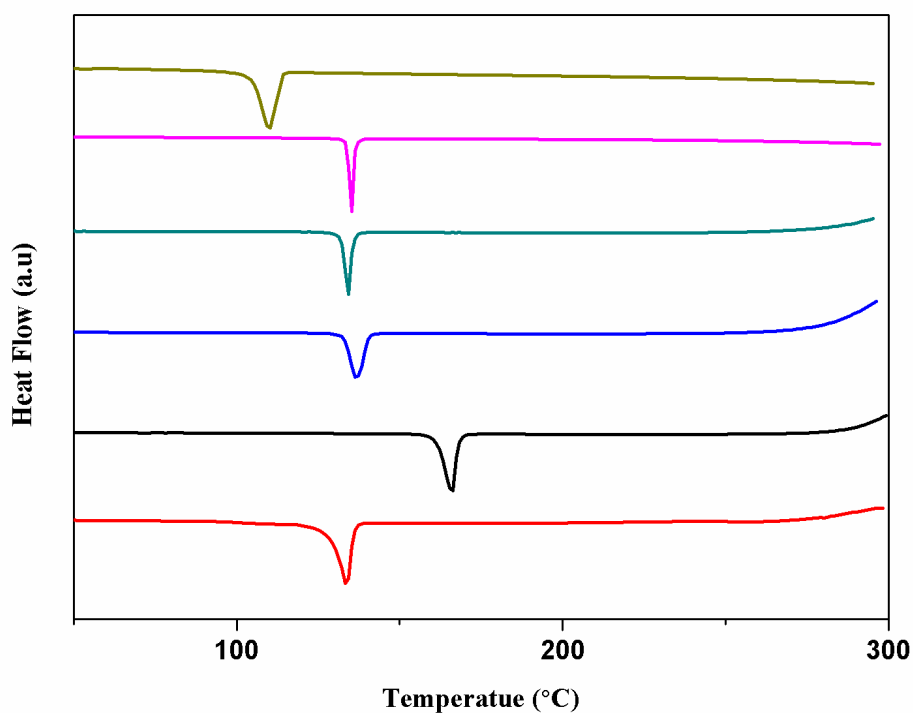

(a)

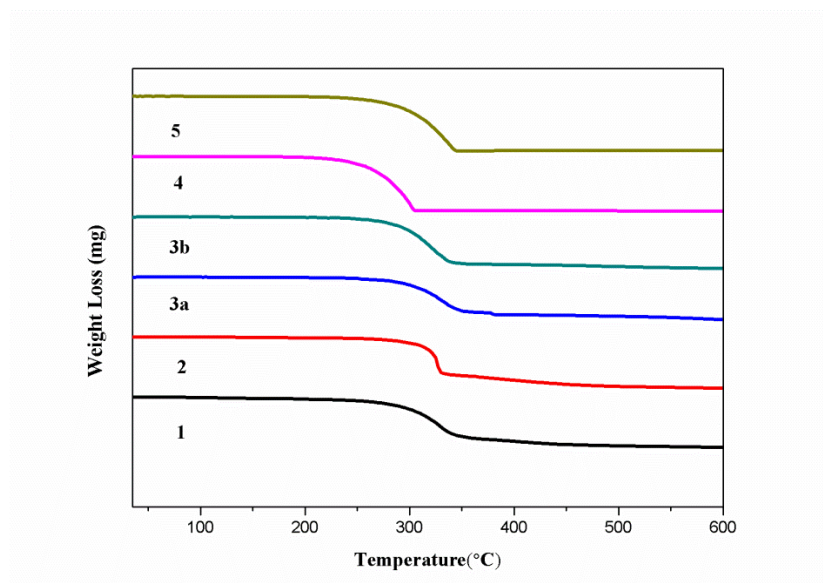

(b)

**Figure S1.** (a) The endotherm of the DSC corresponds to the melting of the respective phases. (b) TGA corresponds to the decomposition of the respective crystalline phases.

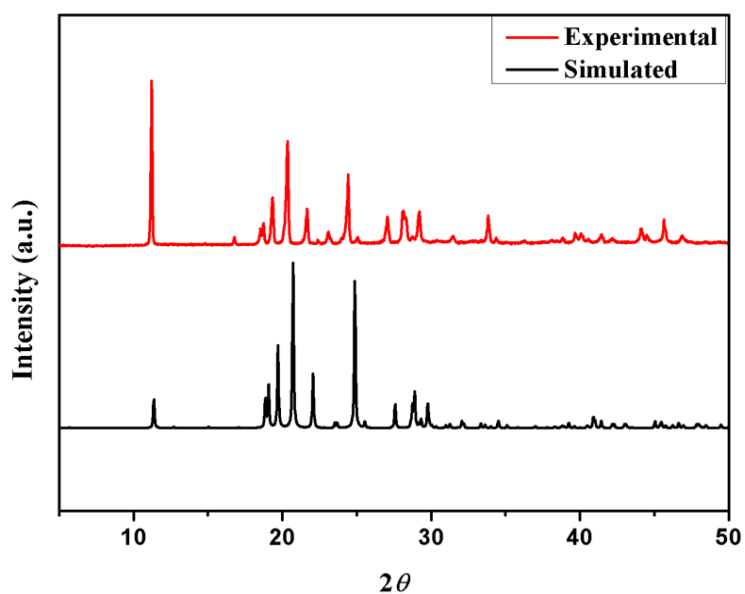

**Figure S2.** PXRD comparison of simulated pattern and experimental pattern for Crystal 1.

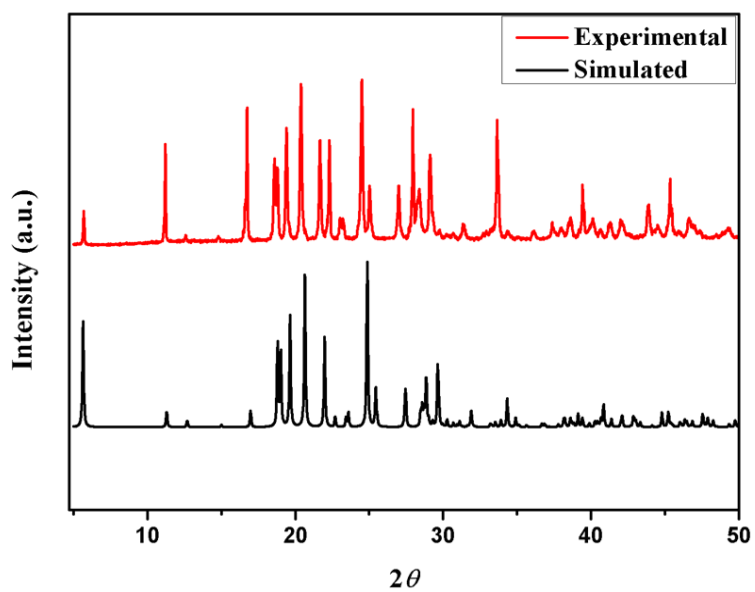

**Figure S3.** PXRD comparison of simulated pattern and experimental pattern for crystal **2**.

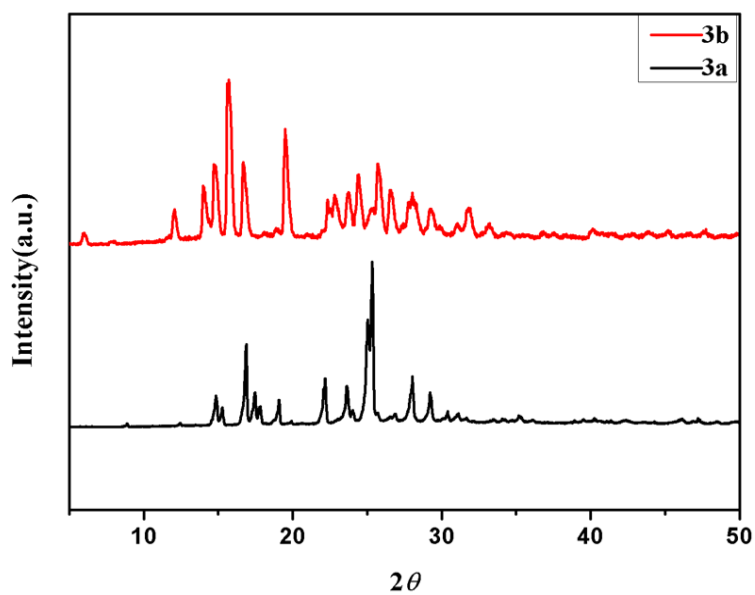

**Figure S4.** Experimental PXRD comparison of crystals **3a** and **3b**.



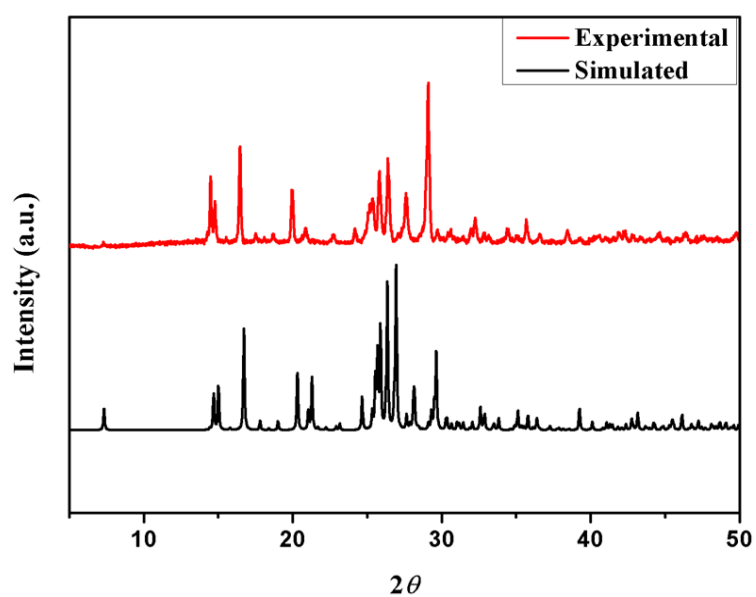

**Figure S5.** PXRD comparison of simulated pattern and experimental pattern for crystal **4**.

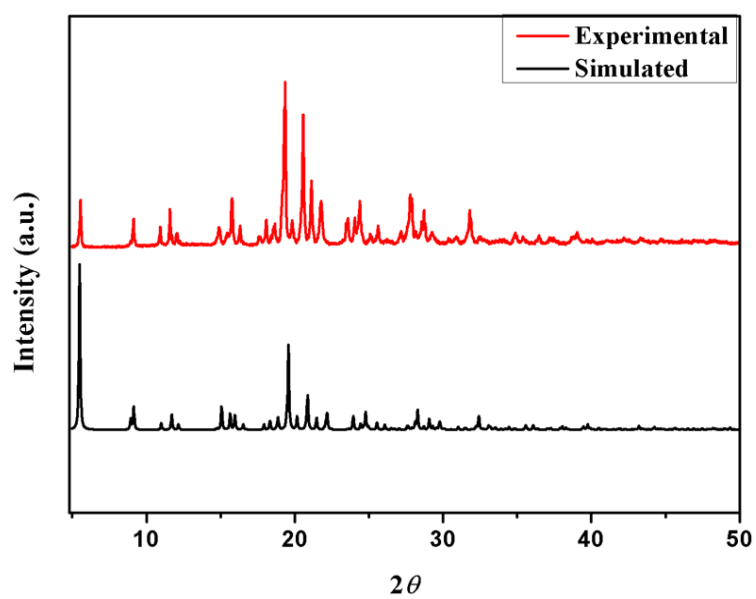

**Figure S6.** PXRD comparison of simulated pattern and experimental pattern for crystal **5**.

## Photoluminescence studies

Room temperature solid-state photoluminescence (PL) measurements were performed on crystalline powder of **4-5** using a HORIBA JobinYvon Nano Log spectrofluorometer using a 450-W Xenon lamp at 350 nm excitation wavelength.

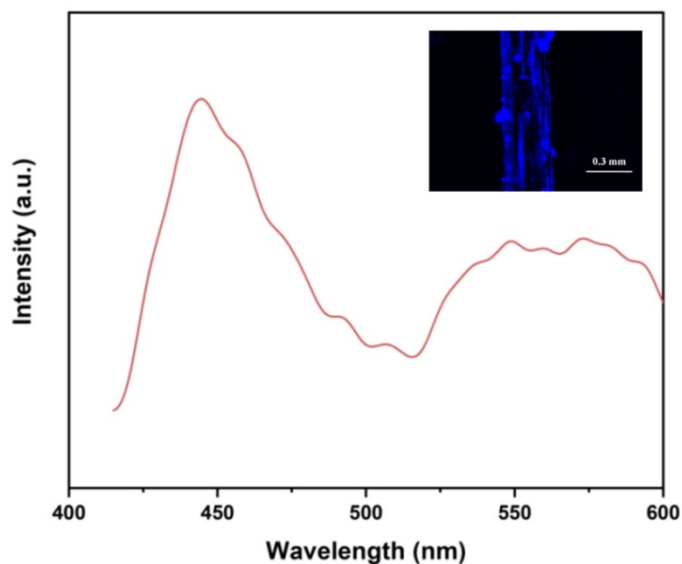

**Figure S7.** Solid-state luminescent emission spectra of compound **4** with fluorescent crystal image ( $\lambda_{\text{ex}} = 350$  nm) at room temperature (inset). Scale bar is 0.3mm

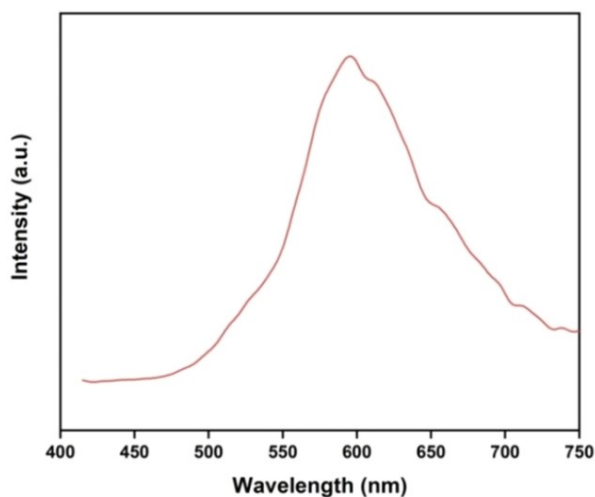

**Figure S8.** Solid-state luminescent emission spectra of compound **5** ( $\lambda_{\text{ex}} = 350$  nm) at room temperature.

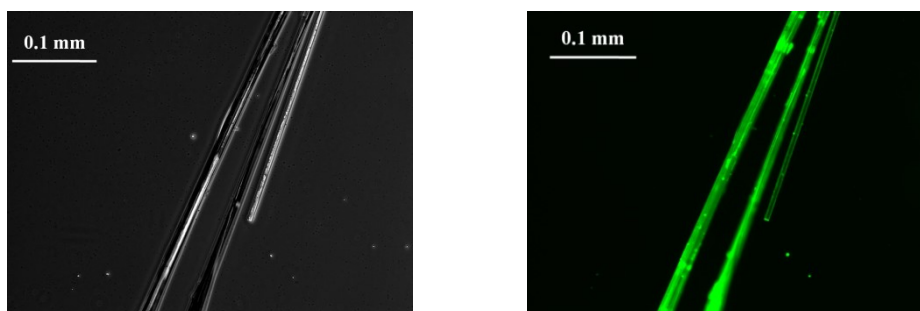

**Figure S9.** Photographs showing the fluorescence of crystal **3b** irradiation at 410 nm with a scale bar of 0.1 mm

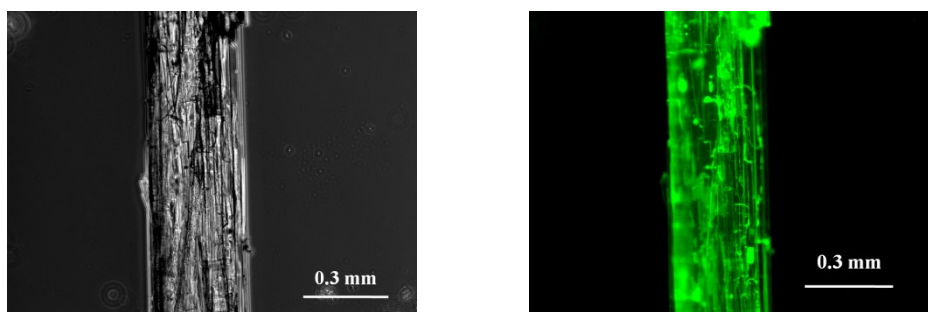

**Figure S10.** Photographs showing the fluorescence of crystal **4** irradiation at 410 nm with scale bar of 0.3 mm

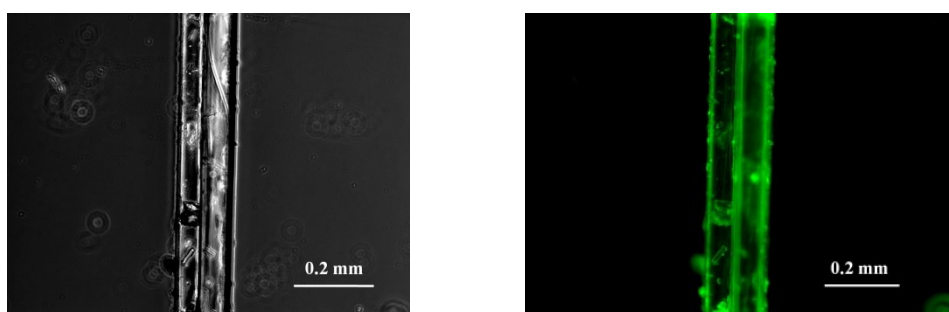

**Figure S11.** Photographs showing the fluorescence of crystal **5** irradiation at 410 nm with a scale bar of 0.3 mm

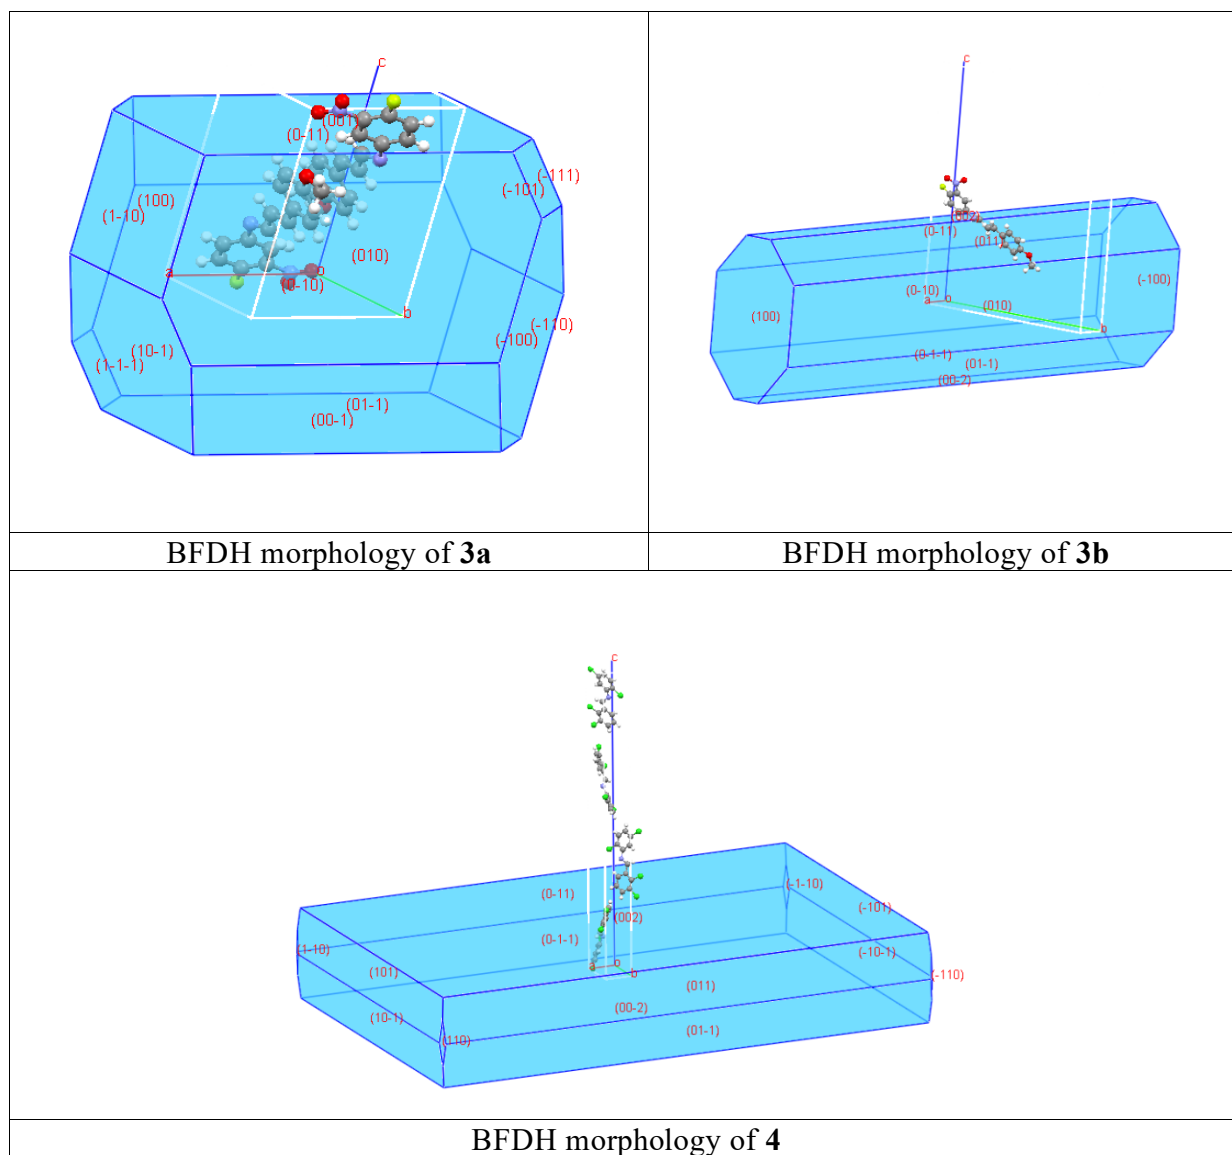

**Figure S12.** BFDH morphology of crystals **3a**, **3b** and **4**.

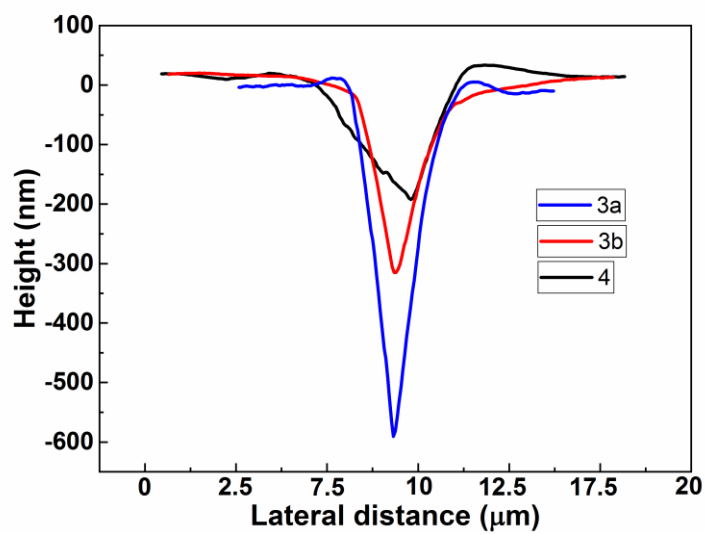

**Figure S13.** Height profiles of the residual indent images for crystals **3a**, **3b** and **4** immediately after unloading.

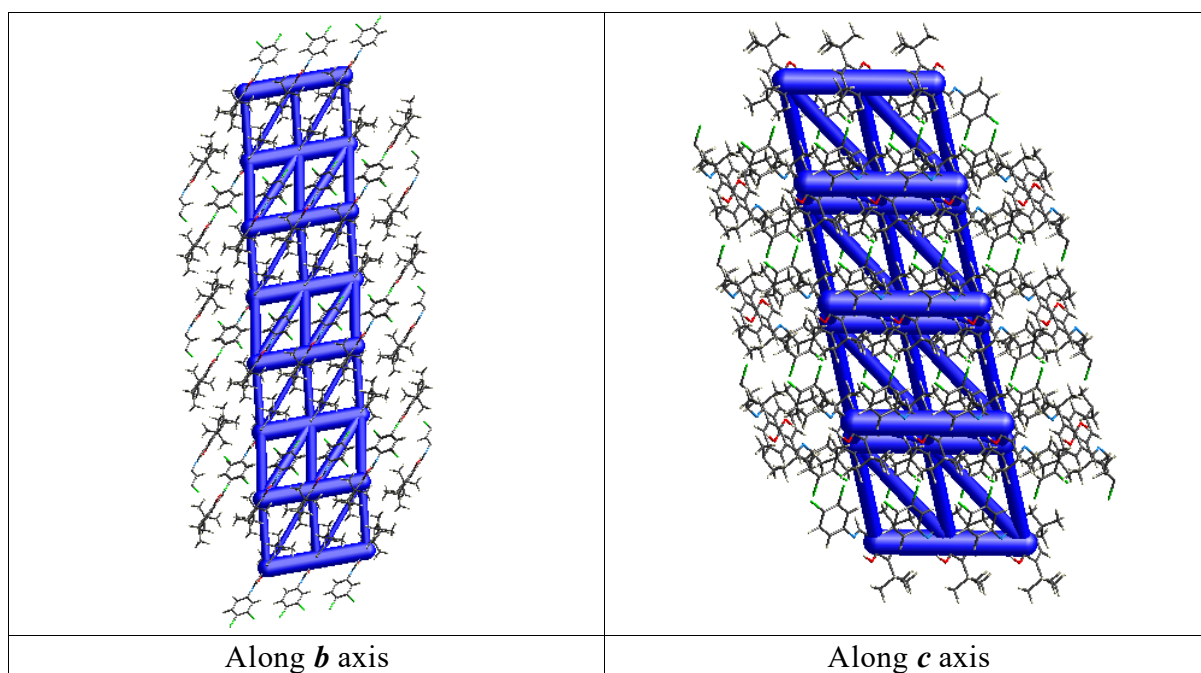

**Figure S14.** Total energy of crystal **5** along *b* and *c* axis indicates interlocked structure.

## References:

1. *Software for Chemical Crystallography* v2016.10-0, Bruker AXS Inc.: Madison, WI, **2016**.
2. Version 8.37A; Bruker AXS Inc: Madison, WI, 2003. Part of the APEX3 v2016.10-0, Bruker AXS Inc.: Madison, WI, **2016**.
3. Version 2016/2; Bruker AXS Inc: Madison, WI, **2003**. Part of the APEX3 v2016.10-0, Bruker AXS Inc.: Madison, WI, **2016**. Krause, L.; Herbst-Irmer, R.; Sheldrick G.M.; Stalke D. J. *Appl. Cryst.*, **2015**, 48, 3–10.
4. *Program for the Solution of Crystal Structures*. Sheldrick, G. M. SHELXT - Integrated Space-Group and Crystal-Structure Determination. *ActaCryst.* **2015**, A71, 3–8.
5. *Program for the Solution and Refining of Crystal Structures*. Sheldrick, G. M. A short history of SHELXL. *ActaCryst.* **2008**, A64, 112–122.
6. Hübschle, C. B.; Sheldrick, G. M.; Dittrich, B. ShelXle: A Qt graphical user interface for SHELXL. *J. Appl. Crystallogr.* **2011**, 44, 1281–1284.
7. *Interactive Molecular Graphics. Part of Program Library for Structure Solution and Molecular Graphics*; Bruker AXS, Inc.: Madison, WI, 2000-2013.
